# Supplementary material
Source: HighWire-hosted journal article supplement (doi:10.1101/rna.080071.124)
Supplement: Supplemental_Fig_S3.docx [file Supplemental_Fig_S3.docx]

**Supplementary Figure S3.** Chemical probing analysis of the *S. pneumoniae glyQS* T-box: tRNAGlyGCC complex. (A) Α 6% PAGE/8M urea denaturing gel showing primer extension analysis of modified with DMS or KE (+) and unmodified (-) *S. pneumoniae glyQS* T-box transcript (20 pmol) in complex with tRNAGlyGCC (200 or 400 pmol). The protection sites by the tRNA ligand are indicated by black stars on the left for DMS and on the right for KE modifications, according to the sequencing tracks (lanes T, G, A and C). (B) The predicted protection sites by the tRNA ligand are indicated by black stars on the predicted secondary structure of the T-box. Spneum_PE_3 (in green) and Spneum_PE_5 (in blue) primers were used for the primer extension analysis of the whole T-box region. Highly conserved (100%) and moderately conserved (66%) nucleotides are indicated with orange and yellow circles, respectively. The specifier codon is indicated with red coloured letters. The trinucleotide at the T-box bulge that interacts with the 3’ CCA of the tRNA is indicated with red circles.
