# Supplementary material
Source: HighWire-hosted journal article supplement (doi:10.1101/rna.080071.124)
Supplement: Supplemental_Fig_S5.docx [file Supplemental_Fig_S5.docx]

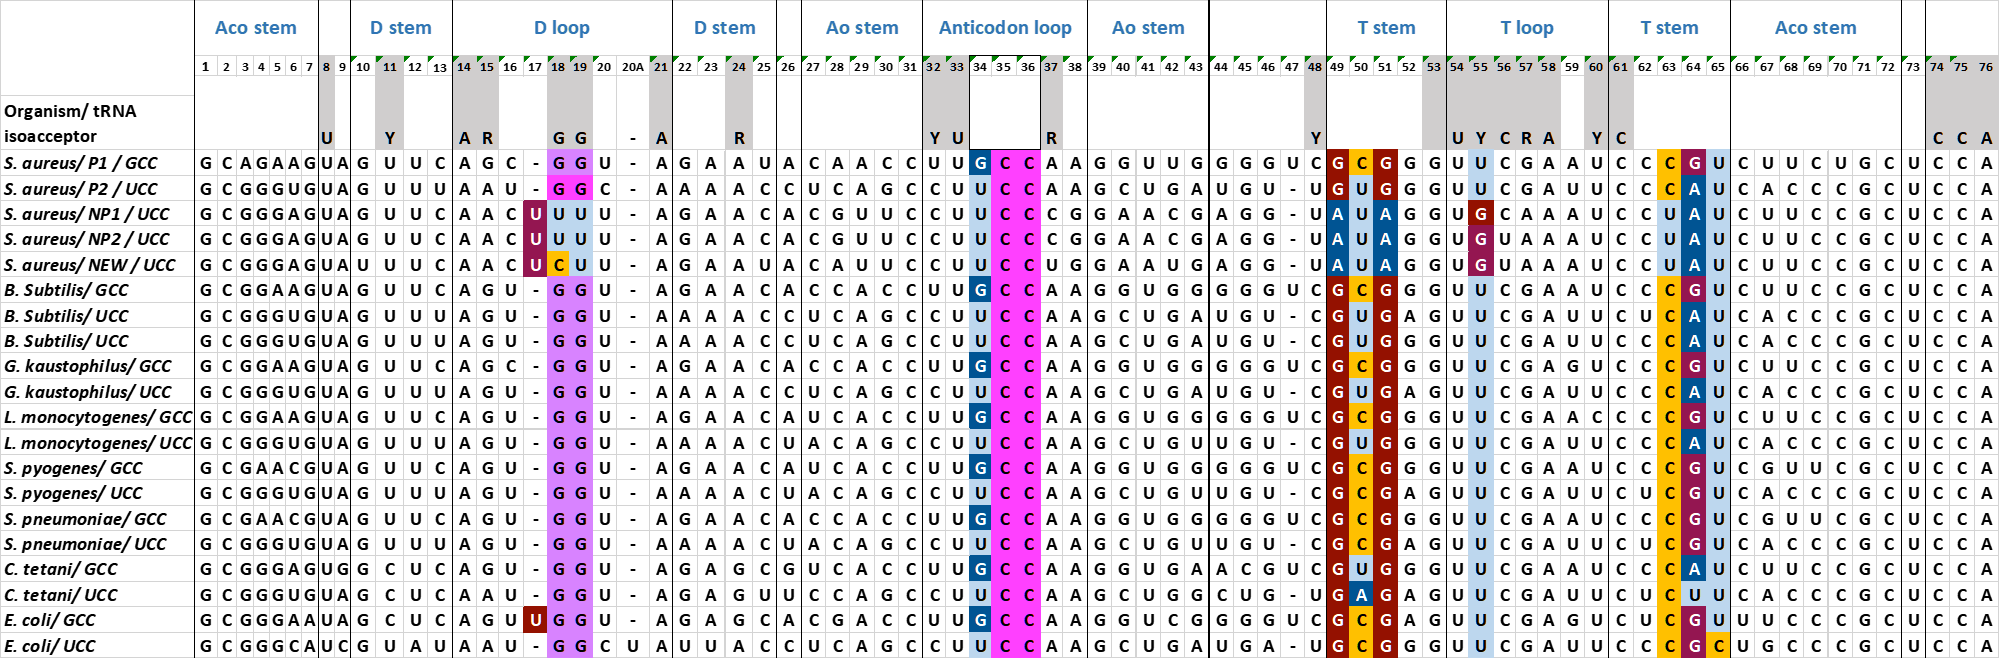


**Supplementary Figure S5.** Multiple sequence alignment of tRNAGly isoacceptors bearing GCC or UCC anticodons found in *S. aureus*, *B. subtilis*, *G. kaustophilus*, *L. monocytogenes*, *S. pyogenes*, *S. pneumoniae*, *C. tetani* and *E. coli*. D-loop and T-stem/loop sequence differentiations at specific positions are indicated by coloured nucleotides. Identity elements identified for aminocylation by GlyRS are boxed and have a grey background. 'Aco' and 'Ao' are acceptor and anticodon stems, respectively. Multiple sequence alignment of the tRNAGly molecules bearing both GCC and UCC anticodons from *L. monocytogenes*, *S. pyogenes*, *S. pneumoniae*, *C. tetani*, *S. aureus, B. subtilis* and *G. kaustophilus* was performed. The tRNAGly from the latter three organisms have been previously used in various structural and functional studies to elucidate and demonstrate the regulatory role of *glyQS* T-boxes mainly from bacilli and staphylococcal species. The alignment revealed that all bacilli tRNAGly are identical and that minor differences are observed with the tRNAs bearing the same anticodon in different organisms. The sequences of the non-proteinogenic tRNAs from *S. aureus* reveal a greater variability, as their sequences vary in position 37 and the wobble position 34 of the anticodon loop, in the D-arm/-loop and the T-arm/-loop. Moreover, the tRNAGlyGCC are identical between the two streptococcal species analysed, but they exhibit difference in their acceptor stem at positions 4, 6, 67 and 69 compared to the *B. subtilis* tRNAGlyGCC. Additionally, *C. tetani* tRNAGlyGCC exhibits several variations compared to *B. subtilis* tRNAGlyGCC at position 5 of the acceptor stem, 11 and 24 of the D-stem, 27 and 43 of the anticodon stem and 50 and 64 of the T-stem. *L. monocytogenes* tRNAGlyGCC exhibits only a few differences from the *B. subtilis* tRNAGlyGCC at position 27 of the anticodon stem and 60 of the D-loop. However, these differences between the streptococcal, *L. monocytogenes* and *C. tetani* tRNAGlyGCC compared to *B. subtilis* tRNAGlyGCC are not in positions that are important for tRNA binding on the T-box or for recognition by GlyRS, for the following *in vivo* and *in vitro* experiments *B. subtilis* tRNAGlyGCC is used.
