# Supplementary material
Source: HighWire-hosted journal article supplement (doi:10.1101/rna.080071.124)
Supplement: Supplemental_Table_S1.docx [file Supplemental_Table_S1.docx]

Supplementary Table 1. List of primers used in the present study.

| **Primer Name** | **Sequence (5’-3’)** | **Application** |
| --- | --- | --- |
| **T7 _EcoRI-FW** | GAATTCCTAATACGACTCACTATA | *B. subtilis* tRNAGlyGCC *in vitro* transcription |
| **BStRNA_RV** | TGGAGCGGAAGACGGGATTCGA |
| **LiMo_PE_3 (116-135)** | CAATTCCCACCTTGATTTCG | Primer extension analysis of *L. monocytogenes glyQS* T-box |
| **LiMo_PE_4 (177-196)** | GCTGATTTAAAGCATATAGG |
| **Clote_PE_3 (113-132)** | CAACAGCCCTGCTCTACATT | Primer extension analysis of C*. tetani glyS* T-box |
| **Clote_GLT-RS** | AAGGGACGAAAGAAAACTTCCG |
| **StPneum _PE_3** | CTAATTTATTACTTCATTGTTTTTG | Primer extension analysis of *S. pneumoniae glyQS* T-box |
| **StPneum_PE_5 (168-189)** | GACAATCCTAGGTTGATTTAAC |
| **StPyog_PE_2 (99-118)** | TAATCACACTGCCCAAACGG | Primer extension analysis of *S. pyogenes glyQS* T-box |
| **StPyog_PE_3 (120-142)** | TTGGGCAATATTGACAAATATAC |
| **StPyog_PE_4 (199-219)** | GCTCCTAAATCATAAGACCT |
| **T7-LiMo_GLT- EcoRI-new_FW** | GAATTCTAATACGACTCACTATAG  GGTATCAACTAATAGGTGCGTT | *L. monocytogenes glyQS* T-box *in vitro* transcription |
| **LiMo_GLT_RL** | TAAAAACTCTCGTCTCTATATGC |
| **T7 Clote_GLT_EcoRI-new_FW** | GAATTCTAATACGACTCACTATAGGG  ATAATTGAATATACCACGATGATA | *C. tetani glyS* T-box *in vitro* transcription |
| **Clote_GLT-RL** | AAAAAACTGCTACCATAAGG |
| **T7_Spneum_GLT_EcoRI_new-FW** | GAATTCTAATACGACTCACTATAG  GGTTTTTGATATAATAGTCAGCAGG | *S. pneumoniae glyQS* T-box *in vitro* transcription |
| **Spneum_GLT_RL** | AAAAGAACCACATCTGACAA |
| **T7-Spyo_GLT_EcoRI-new_FW** | GAATTCTAATACGACTCACTATAG  GGTATGCTAAACTAGACTCTAGG | *S. pyogenes glyQS* T-box *in vitro* transcription |
| **Spyo_GLT-RL** | AAAAACCGCATTTTGATGC |
| **LiMo_GLT-SalI_FW** | GTACCCGTCGACTATCAACTAA  TAGGTGCGTTGAAGG | Cloning of *L. monocytogenes glyQS* T-box in pXS-dTomato vector |
| **LiMo_GLT-BamHI RL** | GACTCGGGATCCTAAAAACTCTC  GTCTCTATATGCTGATTTAAAGCATA  TAGGGACGAGAGTTAGCTCGCG |
| **Spneum_GLT- SalI_F** | GTACGCGTCGACTTTTTGATATAA  TAGTCAGCAGGAAAG | Cloning of *S. pneumoniae glyQS* T-box in pXS-dTomato vector |
| **Spneum_GLT – BamHI _RL** | GACTATGGATCCAAAAGAACCAC  ATCTGACAATCCTAGGTTGATTTAAC  CTAGGGGCGTCAGAAACGCGGTTC |
| **Clote_GLT_SalI-F** | GTACGCGTCGACATAATTGA  ATATACCACGATGATAGAG | Cloning of *C. tetani glyS* T-box in pXS-dTomato vector |
| **Clote_GLT_BamHI_RL** | GACTCGGGATCCAAAAAACTGCTAC  CATAAGGGACGAAAGAAAACTTCCG |
| **Spyo_GLT_SalI_F** | GTACGCGTCGACTATGCTAAA  CTAGACTCTAGGAAAAAGG | Cloning of *S. pyogenes glyQS* T-box in pXS-dTomato vector |
| **Spyo_GLT_BamHI_R** | GAATATGGATCCAAAAACCGCATTT  TGATGCTCCTAAATCATAAGACCTAGG  GGCGTCAAAACGCGGTTC |
| **Q5_ Clote_GGC_FW** | TTGTGAATGGGGCGCTCAAGA  GTGTAAAATG | A97C mutation in *C. tetani glyS* T-box specifier codon |
| **Q5_ Clote_GGC__RV** | TAAAAACTTAGTTATTTACACCAC |
